# Supplementary material
Source: Preprints.org preprint supplement (doi:10.20944/preprints202010.0561.v1)
Supplement: Supplementary file 1 [file supplementary]

**Table S1:** Details of primers for each evaluated gene by qRT-PCR and gene dosage assay.

| **Primers for gene expression assay** | | | |
| --- | --- | --- | --- |
| *Genes* | *Forward (5’→ 3’)* | *Reverse (5’→ 3’)* | *RefSeq mRNA Sequence* |
| *APE1*  *CXCL8* | ACTTCAGGAGCTGCCTGGACT  ATGACTTCCAAGCTGGCCGT | AATCACCCGGCCTTCCTGATCA  TCCTTGGCAAAACTGCACCT | [NM_001244249](http://www.ncbi.nlm.nih.gov/nuccore/NM_001244249)  [NM_000584.](http://www.ncbi.nlm.nih.gov/nuccore/NM_000584.4)4 |
| *EGFR* | CCTGACTCCGTCCAGTCTTG | GCTTGTTACTCGTGCCTTG | [NM_005228](http://www.ncbi.nlm.nih.gov/nuccore/NM_005228) |
| *ErbB2* | TCACCTACAACACAGACACG | GACAGGCAGTCACACAGC | [NM_001005862](http://www.ncbi.nlm.nih.gov/nuccore/NM_001005862) |
| *ErbB3* | AGATGCTGAGATAGTGGTGAAG | ATGGTCTTGGTCAATGTCTGC | [NM_001982](http://www.ncbi.nlm.nih.gov/nuccore/NM_001982) |
| *ErbB4* | CAGATGCTACGGACCTTACG | CATTGAAATTGTGCTCCAGTTG | [NM_005235](http://www.ncbi.nlm.nih.gov/nuccore/NM_005235) |
| *GUSB** | AGCCAGTTCCTCATCAATGG | GGTAGTGGCTGGTACGGAAA | [NM_000181](http://www.ncbi.nlm.nih.gov/nuccore/NM_000181) |
| *HO1* | CCCAGGCAGAGAATGCTGAGTTC | AGCCTTGCGGTGCAGCTCTTC | [NM_002133](http://www.ncbi.nlm.nih.gov/nuccore/NM_002133) |
| *JUN/AP1* | TCGACATGGAGTCCCAGGA | GGCGATTCTCTCCAGCTTCC | [NM_002228](http://www.ncbi.nlm.nih.gov/nuccore/NM_002228) |
| *MUTYH* | TCGTCTCCCGCCTGAGTCGT | CAGAAGGCTTTGGCCTGACT | [NM_001048171](http://www.ncbi.nlm.nih.gov/nuccore/NM_001048171) |
| *NRF2* | TTCAGCCAGCCCAGCACATC | CGTAGCCCGAAGAAACCTCATTGTC | [NM_001313902](http://www.ncbi.nlm.nih.gov/nuccore/NM_001313902) |
| *OGG1* | TGGACCTGGTTCTGCCTTCT | TAGCCTGGCTCTTGTCTCCT | [NM_016821](http://www.ncbi.nlm.nih.gov/nuccore/NM_016821) |
| *PPARG* | ACTATGGAGTTCATGCTTGTGA | CCGACAGTACTGACATTTATTTC | [NM_001354666](http://www.ncbi.nlm.nih.gov/nuccore/NM_001354666) |
| *TPO* | TCTCATTGGGAAGCAGATGAAG | TCTGTGCATCCGTGAAGACGT | [NM_000547](http://www.ncbi.nlm.nih.gov/nuccore/NM_000547) |
| *ZEB1* | CGCAGTCTGGGTGTAATCGTA | CGTTTCTTGCAGTTTGGGCATT | [NM_001128128](http://www.ncbi.nlm.nih.gov/nuccore/NM_001128128)ì |
| **Primers for gene dosage assay** | | | |
| *Genes* | *Forward (5’→ 3’)* | *Reverse (5’→ 3’)* | *RefSeq DNA sequence* |
| *Β-actin** | TACCACTGGCATCGTGATGG | CGGTGAGGATCTTCATCAGG | [NC_000007.14](http://www.ncbi.nlm.nih.gov/entrez/viewer.fcgi?val=NC_000007.14&from=5527148&to=5563784&dopt=gb&strand=2) |
| *MUTYH*  Amplicon 1  Amplicon 2 | GAAGCTGCGGGAGCTGAAA  AGCCCCTCTTGGCTTGAGTA | ATCCCCGACTGCCTGAACC  TGCCGATTCCCTCCATTCT | [NC_000001.11](http://www.ncbi.nlm.nih.gov/entrez/viewer.fcgi?val=NC_000001.11&from=45329163&to=45340893&dopt=gb&strand=2) |
| *OGG1*  Amplicon 1  Amplicon 2 | TCTTTGGGCGTCGACGAGG TGTTCAGTGCCGACCTGCGCC | GAGGGGACAGGCTTCTCAG TTTGGAACCCTTTCTGCGCT | [NC_000003.12](http://www.ncbi.nlm.nih.gov/entrez/viewer.fcgi?val=NC_000003.12&from=9749944&to=9788246&dopt=gb&strand=1) |

* Housekeeping gene.

Analyzed genes: *APE1,* Apurinic/apyrimidinic Endodeoxyribonuclease 1; *EGFR,* Epidermal Growth Factor Receptor; *ErbB2,* Erb-b2 receptor tyrosine kinase 2; *ErbB3,* Erb-b3 receptor tyrosine kinase 3; *ErbB4,* Erb-b4 receptor tyrosine kinase 4; *GUSB,* Glucuronidase Beta; *HO-1),* Heme Oxygenase 1; *JUN/AP1,* Jun proto-oncogene, AP-1 transcription factor subunit; *MUTYH,* MutY DNA glycosylase; *NRF2,* Nuclear Factor, erythroid 2 like 2; *OGG1,* 8-Oxoguanine Glycosylase; *PPARG,* Peroxisome Proliferator Activated Receptor Gamma; *TPO,* Thyroperoxidase; *ZEB1,* Zinc finger E-box Binding homeobox 1.
